# Supplementary material
Source: Springer Nature journal article supplement (https://www.springermedizin.de/resource/supplementary/12985_2014_2411_MOESM1_ESM.pdf/9607040)
Supplement: MOESM1 [file 9607040]

**Supplementary Table 2: Percentage of amino acid identity between different H5 sequences used in immunization studies and in serological test antigens.**

|                  | <b>H5N2 LP</b> | <b>H5N1 LP</b> | <b>H5N3 LP</b> | <b>Opt 2.1</b> | <b>2.2.1 G1</b> | <b>2.2.1 G2</b> | <b>Opt 2.2.1</b> |
|------------------|----------------|----------------|----------------|----------------|-----------------|-----------------|------------------|
| <b>H5N1 LP</b>   | 96,6           |                |                |                |                 |                 |                  |
| <b>H5N3 LP</b>   | 97,5           | 96,6           |                |                |                 |                 |                  |
| <b>Opt 2.1</b>   | 93,6           | 92,6           | 92,7           |                |                 |                 |                  |
| <b>2.2.1 G1</b>  | 92,4           | 91,8           | 92,7           | 96,6           |                 |                 |                  |
| <b>2.2.1 G2</b>  | 92,7           | 92,2           | 93,1           | 97,0           | 99,3            |                 |                  |
| <b>Opt 2.2.1</b> | 92,9           | 92,4           | 93,1           | 97,0           | 98,9            | 99,3            |                  |
| <b>Opt 2.3.4</b> | 92,7           | 91,7           | 92,4           | 96,8           | 96,3            | 96,6            | 96,4             |

**Supplementary Table 3: Amino acid differences between H5 sequences used in immunization studies and in serological test antigens, according to their position.**

Only positions presenting difference(s) between H5N2 LP A/duck/France/05057b/2007 hemagglutinin and the other proteins are presented.

(.): for a given position (head of the column), amino acid identical to H5N2 LP protein.

|                | 5        | 9        | 10       | 11       | 16       | 51       | 52       | 59       | 61       | 87       | 99       | 100      | 102      | 104      | 110      | 111      | 123      | 124      | 135      | 140      |
|----------------|----------|----------|----------|----------|----------|----------|----------|----------|----------|----------|----------|----------|----------|----------|----------|----------|----------|----------|----------|----------|
| <b>H5N2 LP</b> | <b>V</b> | <b>A</b> | <b>I</b> | <b>V</b> | <b>S</b> | <b>K</b> | <b>A</b> | <b>S</b> | <b>N</b> | <b>L</b> | <b>D</b> | <b>N</b> | <b>V</b> | <b>G</b> | <b>D</b> | <b>L</b> | <b>S</b> | <b>T</b> | <b>R</b> | <b>N</b> |
| H5N1 LP        | .        | V        | T        | .        | G        | R        | T        | .        | .        | .        | .        | S        | .        | .        | .        | F        | .        | .        | .        | .        |
| H5N3 LP        | .        | .        | .        | I        | .        | .        | .        | .        | .        | .        | .        | .        | .        | .        | .        | F        | .        | .        | .        | .        |
| Opt 2.1        | .        | .        | .        | .        | .        | .        | T        | D        | D        | I        | A        | .        | A        | D        | N        | .        | R        | I        | K        | D        |
| 2.2.1 G1       | .        | .        | .        | .        | .        | .        | T        | D        | D        | .        | I        | .        | A        | D        | N        | F        | R        | I        | K        | D        |
| 2.2.1 G2       | M        | .        | .        | .        | .        | .        | T        | D        | D        | .        | I        | .        | A        | D        | N        | F        | R        | I        | K        | D        |
| Opt 2.2.1      | .        | .        | .        | .        | .        | .        | T        | D        | D        | .        | I        | .        | A        | D        | N        | F        | R        | I        | K        | D        |
| Opt 2.3.4      | .        | .        | .        | .        | .        | .        | T        | D        | D        | I        | A        | .        | A        | D        | N        | F        | R        | I        | K        | D        |

|                | 142      | 145      | 152      | 154      | 156      | 157      | 170      | 171      | 172      | 179      | 190      | 194      | 197      | 204      | 205      | 211      | 214      | 223      | 225      | 228      |
|----------------|----------|----------|----------|----------|----------|----------|----------|----------|----------|----------|----------|----------|----------|----------|----------|----------|----------|----------|----------|----------|
| <b>H5N2 LP</b> | <b>D</b> | <b>S</b> | <b>L</b> | <b>N</b> | <b>K</b> | <b>S</b> | <b>N</b> | <b>N</b> | <b>A</b> | <b>S</b> | <b>V</b> | <b>I</b> | <b>P</b> | <b>T</b> | <b>K</b> | <b>T</b> | <b>V</b> | <b>H</b> | <b>S</b> | <b>E</b> |
| H5N1 LP        | .        | .        | P        | .        | R        | .        | .        | S        | .        | .        | .        | .        | .        | .        | .        | N        | .        | Q        | .        | .        |
| H5N3 LP        | .        | .        | P        | .        | R        | .        | .        | .        | .        | N        | .        | .        | .        | .        | .        | .        | .        | Q        | .        | .        |
| Opt 2.1        | E        | .        | P        | Q        | .        | .        | S        | .        | .        | .        | .        | .        | .        | .        | R        | .        | I        | Q        | L        | K        |
| 2.2.1 G1       | E        | .        | P        | Q        | R        | .        | D        | .        | .        | .        | .        | V        | .        | I        | R        | .        | I        | Q        | L        | K        |
| 2.2.1 G2       | E        | .        | P        | Q        | R        | .        | D        | .        | .        | .        | .        | .        | .        | .        | R        | .        | I        | Q        | L        | K        |
| Opt 2.2.1      | E        | A        | P        | Q        | R        | .        | D        | .        | .        | .        | .        | .        | .        | .        | R        | .        | I        | Q        | L        | K        |
| Opt 2.3.4      | E        | .        | P        | Q        | T        | P        | .        | .        | T        | .        | I        | .        | S        | .        | .        | .        | I        | Q        | L        | K        |

|                | 231      | 233      | 234      | 243      | 250      | 256      | 268      | 273      | 277      | 279      | 281      | 284      | 285      | 298      | 325      | 326      | 336      | 338      | 339      | 341      |
|----------------|----------|----------|----------|----------|----------|----------|----------|----------|----------|----------|----------|----------|----------|----------|----------|----------|----------|----------|----------|----------|
| <b>H5N2 LP</b> | <b>T</b> | <b>P</b> | <b>K</b> | <b>E</b> | <b>R</b> | <b>N</b> | <b>Y</b> | <b>V</b> | <b>D</b> | <b>A</b> | <b>I</b> | <b>G</b> | <b>L</b> | <b>M</b> | <b>D</b> | <b>R</b> | <b>V</b> | <b>Q</b> | <b>R</b> | <b>T</b> |
| H5N1 LP        | .        | .        | .        | .        | K        | S        | .        | I        | .        | .        | M        | .        | .        | .        | .        | .        | .        | .        | .        | .        |
| H5N3 LP        | .        | .        | R        | .        | K        | .        | .        | .        | N        | .        | M        | .        | .        | .        | .        | .        | .        | .        | K        | A        |
| Opt 2.1        | I        | S        | .        | .        | K        | .        | .        | .        | .        | .        | M        | E        | .        | .        | N        | .        | S        | .        | .        | .        |
| 2.2.1 G1       | .        | S        | .        | .        | K        | .        | N        | .        | .        | T        | M        | E        | .        | I        | N        | .        | S        | .        | G        | K        |
| 2.2.1 G2       | .        | S        | .        | .        | K        | .        | N        | .        | .        | T        | M        | E        | .        | I        | N        | .        | S        | .        | G        | K        |
| Opt 2.2.1      | .        | S        | .        | .        | K        | .        | N        | .        | .        | T        | M        | E        | .        | I        | S        | .        | S        | .        | G        | .        |
| Opt 2.3.4      | .        | S        | .        | D        | K        | .        | .        | .        | .        | .        | .        | E        | V        | I        | N        | K        | S        | L        | .        | -        |

|                | 374      | 390      | 393      | 410      | 485      | 494      | 500      | 509      | 511      | 523      | 544      | 545      | 550      |
|----------------|----------|----------|----------|----------|----------|----------|----------|----------|----------|----------|----------|----------|----------|
| <b>H5N2 LP</b> | <b>S</b> | <b>I</b> | <b>K</b> | <b>K</b> | <b>K</b> | <b>V</b> | <b>D</b> | <b>R</b> | <b>N</b> | <b>M</b> | <b>M</b> | <b>I</b> | <b>F</b> |
| H5N1 LP        | .        | .        | R        | .        | .        | .        | .        | K        | .        | .        | .        | V        | .        |
| H5N3 LP        | T        | .        | .        | .        | .        | .        | .        | .        | .        | .        | .        | V        | .        |
| Opt 2.1        | .        | V        | .        | R        | .        | I        | N        | .        | K        | I        | .        | M        | L        |
| 2.2.1 G1       | .        | V        | .        | R        | R        | .        | .        | .        | K        | I        | I        | V        | L        |
| 2.2.1 G2       | .        | V        | .        | R        | R        | .        | .        | .        | K        | I        | .        | V        | L        |
| Opt 2.2.1      | .        | V        | .        | R        | R        | .        | .        | .        | K        | I        | .        | V        | L        |
| Opt 2.3.4      | .        | V        | .        | R        | .        | .        | .        | .        | K        | I        | .        | V        | L        |
